# Supplementary material for: Quantifying the contribution of Fc-mediated effector functions to the antiviral activity of anti–HIV-1 IgG1 antibodies in vivo
Source: PubMed Central journal article supplement — Proc Natl Acad Sci U S A. 2020 Jul 14;117(30):18002–9. doi: 10.1073/pnas.2008190117 (PMC7395461; doi:10.1073/pnas.2008190117), 2020-07-14
Supplement: pnas.2008190117.sapp.pdf [file pnas.2008190117.sapp.pdf]

Supplementary Information for

**Quantifying the contribution of Fc-mediated effector functions to the antiviral activity of anti-HIV-1 IgG1 antibodies *in vivo***

Pengfei Wang<sup>1</sup>, Mili R. Gajjar<sup>1</sup>, Jian Yu<sup>1</sup>, Neal N. Padte<sup>1</sup>, Agegnehu Gettie<sup>1</sup>, James L. Blanchard<sup>2</sup>, Kasi Russell-Lodrigue<sup>2</sup>, Laura E. Liao<sup>3</sup>, Alan S. Perelson<sup>3</sup>, Yaoxing Huang<sup>1</sup>, & David D. Ho<sup>1\*</sup>

<sup>1</sup>Aaron Diamond AIDS Research Center, Columbia University Vagelos College of Physicians and Surgeons, 701 W. 168th Street, New York, NY 10032, USA.

<sup>2</sup>Tulane National Primate Research Center, Covington, LA 70433, USA.

<sup>3</sup>Theoretical Biology and Biophysics, Los Alamos National Laboratory, Los Alamos, NM 87545, USA.

\*To whom correspondence should be addressed: [dh2994@cumc.columbia.edu](mailto:dh2994@cumc.columbia.edu).

**This PDF file includes:**

Figures S1 to S5  
Tables S1 to S2

$$\frac{dT^*}{dt} = kVT - \delta T^* \quad (1)$$

$$\frac{dV}{dt} = N\delta T^* - cV \quad (2)$$

**Fig. S1. Mathematical equations describing the dynamics of productively HIV-1-infected CD4 T cells ( $T^*$ ) and plasma virus particles ( $V$ ).**  $T$ , uninfected but susceptible CD4 T cells;  $k$ , infectivity constant of virions for susceptible CD4 T cells;  $\delta$ , the death rate of productively infected CD4 T cells;  $c$ , HIV particle clearance rate; and  $N$ , the burst size or the number of virions produced by an infected CD4 T cell over its lifespan.

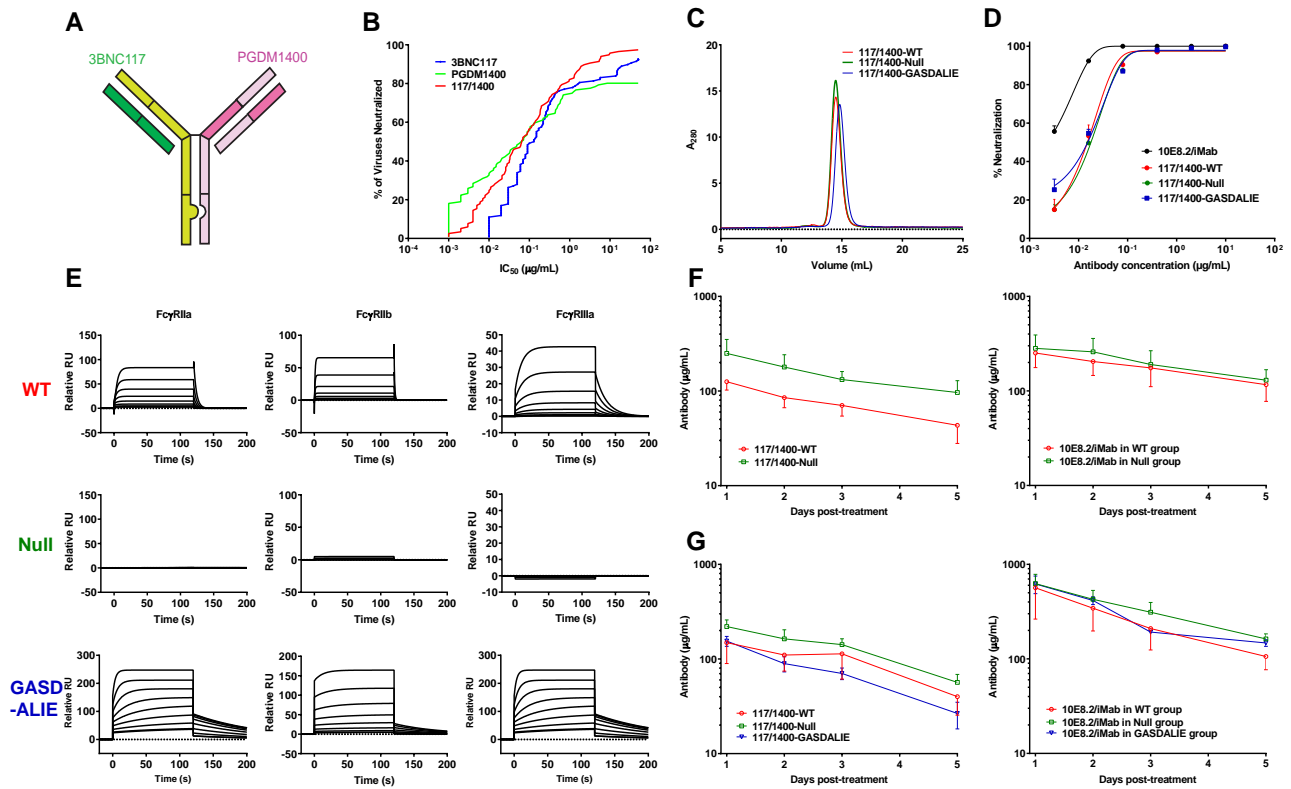

**Fig. S2. *In vitro* characterization and *in vivo* PK profiles of 117/1400 variants and 10E8.2/iMab used for humanized mouse experiments. (A)** A schematic depiction of 117/1400. **(B)** Antiviral coverage of 117/1400 and its parental antibodies against a panel of 118 multi-clade HIV-1 strains. **(C)** Size exclusion chromatography (SEC) analysis of 117/1400 variants. **(D)** *In vitro* neutralization of HIV-1<sub>JR-CSF</sub> by 117/1400 variants and 10E8.2/iMab. **(E)** Biacore sensograms of 117/1400 variants binding to human Fc $\gamma$ Rs. **(F)** and **(G)** PK profiles of 117/1400 variants and 10E8.2/iMab in the first **(F)** and second **(G)** experiment in HIV-1-infected humanized mice.

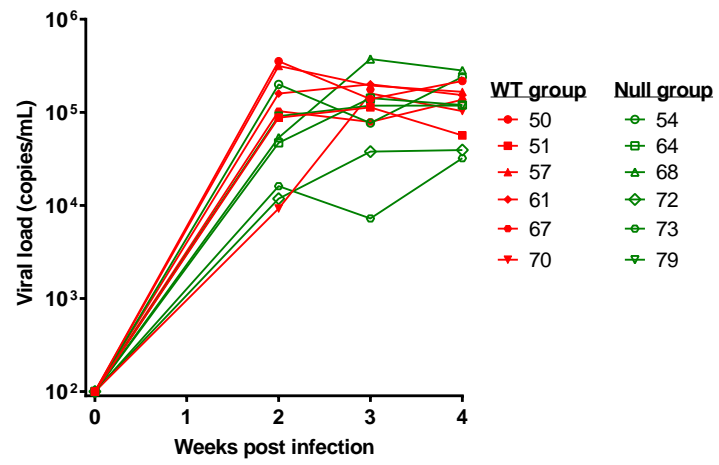

**Fig. S3. Plasma viral load before antibody administration in the first humanized mouse experiment.**

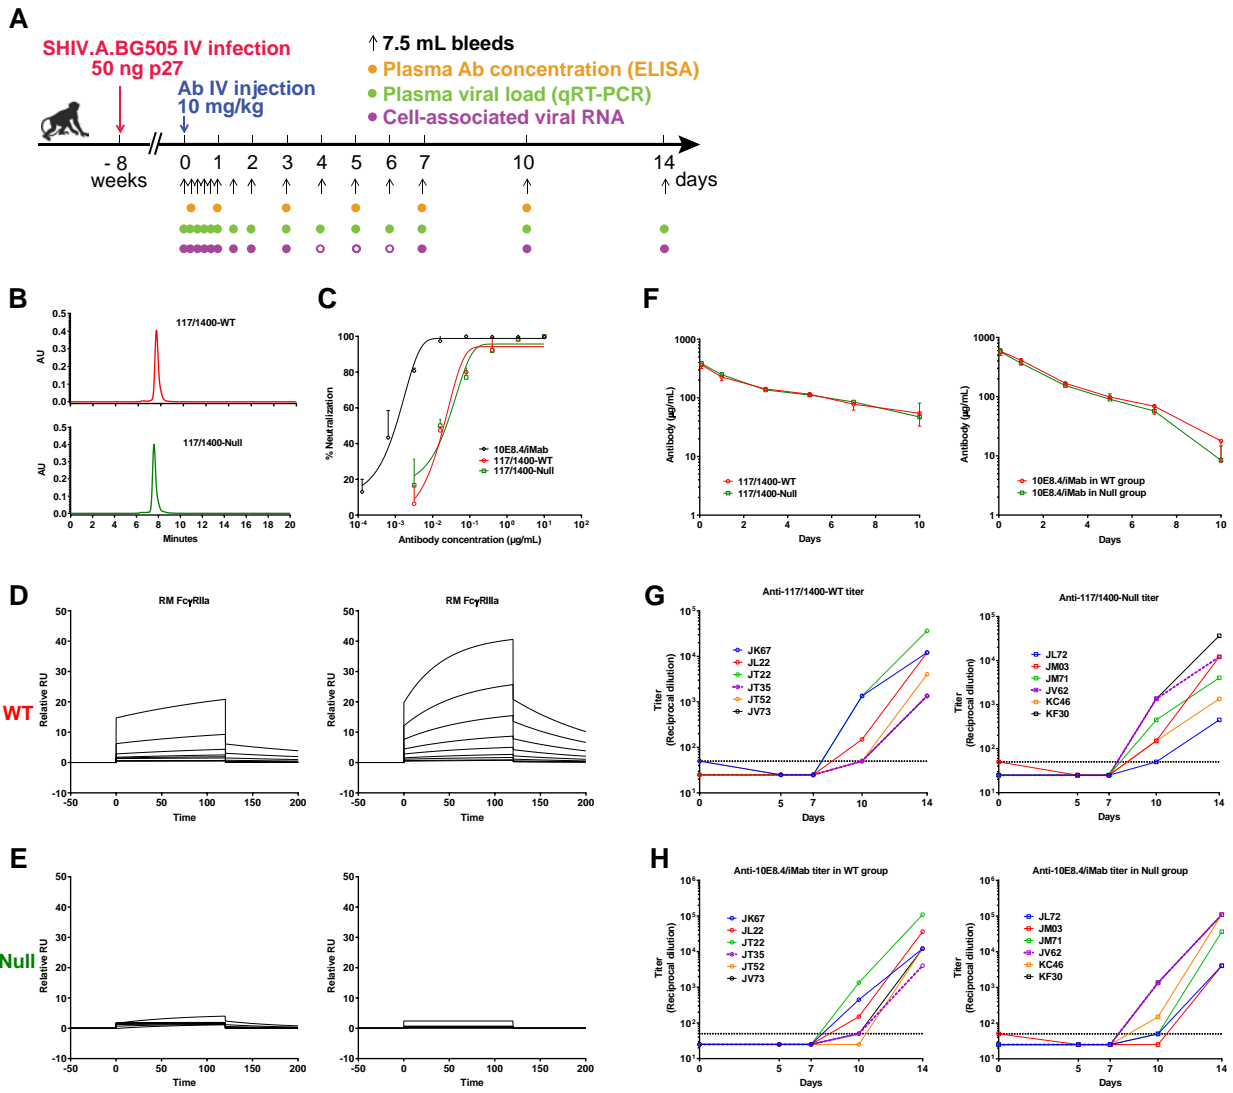

**Fig. S4. *In vitro* characterization and *in vivo* PK profiles of 117/1400 variants and 10E8.4/iMab used for rhesus macaque experiments. (A)** Experimental schema for the viral dynamics experiment performed in rhesus macaques. Open purple circles indicate time points when insufficient PBMCs were collected from some of the monkeys to measure cell-associated SHIV RNA. **(B)** SEC analysis of WT and Null variants of 117/1400 that were separately manufactured at Wuxi Biologics, Inc. **(C)** *In vitro* neutralization of SHIV.A.BG505 by 117/1400 variants, and by 10E8.4/iMab. **(D and E)**

Biacore sensograms of 117/1400 WT **(D)** and Null variants **(E)** binding to rhesus Fc $\gamma$ Rs. **(F)** PK profiles of 117/1400 variants and 10E8.4/iMab in the two groups of macaques. **(G)** and **(H)** Rhesus anti-human IgG response against 117/1400 **(G)** or 10E8.4/iMab **(H)** detected in serum by ELISA.

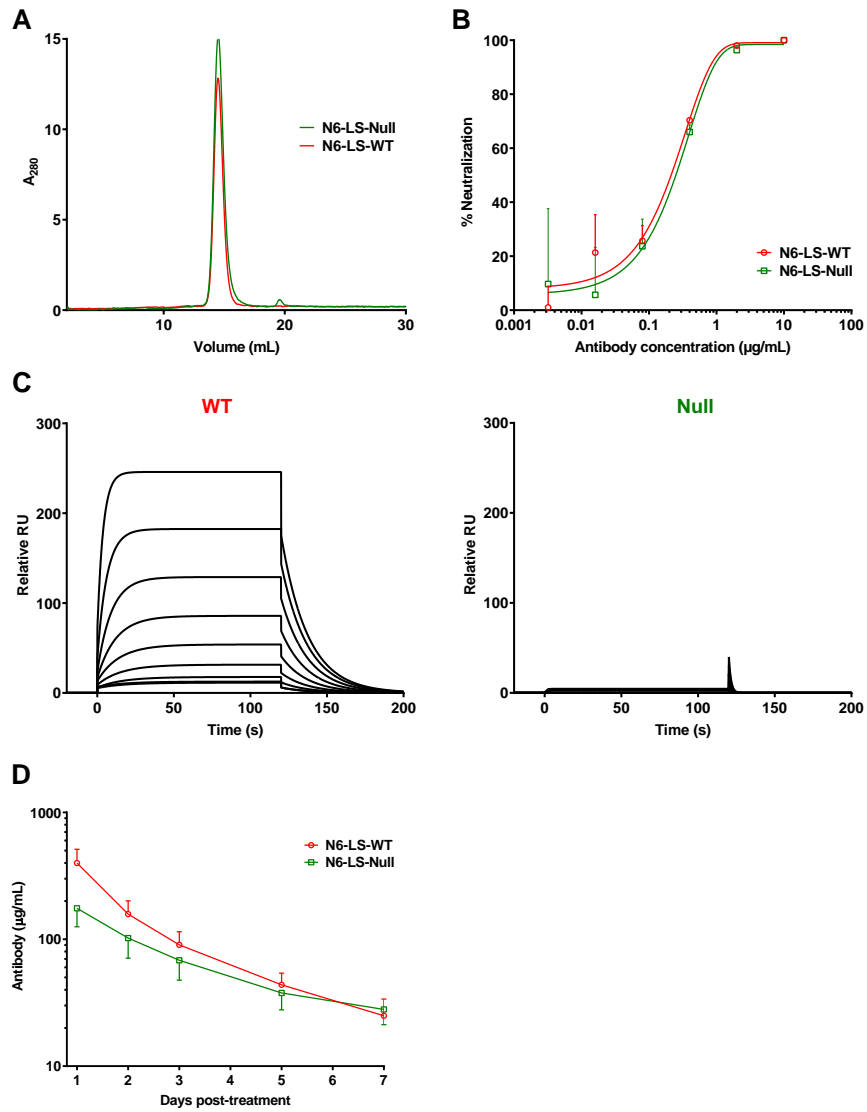

**Fig. S5. *In vitro* characterization and *in vivo* PK profiles of N6-LS-WT and N6-LS-Null in the final humanized mouse experiment. (A) SEC analysis of N6-LS variants. (B) *In vitro* neutralization against HIV-1<sub>pNL(AD8)</sub> by N6-LS variants. (C) Biacore sensograms of N6-LS variants binding to human Fc $\gamma$ R11a. (D) PK profiles of N6-LS-WT and N6-LS-Null in the final humanized mouse experiment.**

**Table S1: Baseline characteristics of HIV-1-infected humanized mice**

**1<sup>st</sup> Experiment**

| <b>WT Group</b> |        |             |             |                                      |
|-----------------|--------|-------------|-------------|--------------------------------------|
| Mouse #         | Gender | % huCD45    | % CD4       | VL (copies /mL)                      |
| 50              | Female | 72.1        | 38.8        | $2.17 \times 10^5$                   |
| 51              | Female | 81.6        | 65.7        | $5.65 \times 10^4$                   |
| 57              | Female | 77.2        | 54.4        | $1.66 \times 10^5$                   |
| 61              | Male   | 54.8        | 63.5        | $1.53 \times 10^5$                   |
| 67              | Female | 80.5        | 59.3        | $1.37 \times 10^5$                   |
| 70              | Male   | 62.0        | 68.8        | $1.03 \times 10^5$                   |
| <b>Mean</b>     |        | <b>71.4</b> | <b>58.4</b> | <b><math>1.39 \times 10^5</math></b> |
| <b>Median</b>   |        |             |             | <b><math>1.45 \times 10^5</math></b> |

| <b>Null Group</b> |        |             |             |                                      |
|-------------------|--------|-------------|-------------|--------------------------------------|
| Mouse #           | Gender | % huCD45    | % CD4       | VL (copies /mL)                      |
| 54                | Male   | 16.3        | 69.6        | $2.40 \times 10^5$                   |
| 64                | Female | 77.9        | 49.9        | $1.20 \times 10^5$                   |
| 68                | Female | 78.8        | 49.2        | $2.82 \times 10^5$                   |
| 72                | Female | 71.2        | 74.4        | $3.94 \times 10^4$                   |
| 73                | Female | 57.9        | 55.3        | $3.21 \times 10^4$                   |
| 79                | Female | 80.7        | 60.5        | $1.18 \times 10^5$                   |
| <b>Mean</b>       |        | <b>60.4</b> | <b>59.7</b> | <b><math>1.39 \times 10^5</math></b> |
| <b>Median</b>     |        |             |             | <b><math>1.19 \times 10^5</math></b> |

**2<sup>nd</sup> Experiment**

| <b>WT Group</b> |        |             |             |                                      |
|-----------------|--------|-------------|-------------|--------------------------------------|
| Mouse #         | Gender | % huCD45    | % CD4       | VL (copies /mL)                      |
| 3               | Female | 94.1        | 63.8        | $2.10 \times 10^5$                   |
| 4               | Female | 89.8        | 44.0        | $6.24 \times 10^4$                   |
| 32              | Female | 77.5        | 40.9        | $1.20 \times 10^4$                   |
| 59              | Male   | 50.1        | 55.5        | $7.32 \times 10^5$                   |
| 82              | Male   | 75.4        | 52.0        | $1.71 \times 10^5$                   |
| <b>Mean</b>     |        | <b>77.4</b> | <b>51.2</b> | <b><math>2.38 \times 10^5</math></b> |
| <b>Median</b>   |        |             |             | <b><math>1.71 \times 10^5</math></b> |

| <b>Null Group</b> |        |             |             |                                      |
|-------------------|--------|-------------|-------------|--------------------------------------|
| Mouse #           | Gender | % huCD45    | % CD4       | VL (copies /mL)                      |
| 23                | Female | 75.9        | 61.6        | $1.37 \times 10^5$                   |
| 60                | Male   | 68.3        | 15.4        | $1.55 \times 10^5$                   |
| 88                | Female | 80.6        | 50.6        | $2.97 \times 10^5$                   |
| 89                | Male   | 56.3        | 48.1        | $4.32 \times 10^4$                   |
| <b>Mean</b>       |        | <b>70.3</b> | <b>43.9</b> | <b><math>1.58 \times 10^5</math></b> |
| <b>Median</b>     |        |             |             | <b><math>1.46 \times 10^5</math></b> |

**GASDALIE Group**

| Mouse #       | Gender | % huCD45    | % CD4       | VL (copies /mL)                      |
|---------------|--------|-------------|-------------|--------------------------------------|
| 11            | Male   | 73.8        | 57.0        | $9.14 \times 10^4$                   |
| 14            | Female | 91.6        | 53.4        | $1.11 \times 10^5$                   |
| 29            | Female | 28.8        | 78.5        | $1.36 \times 10^6$                   |
| 91            | Female | 76.3        | 52.5        | $1.11 \times 10^4$                   |
| <b>Mean</b>   |        | <b>67.6</b> | <b>60.4</b> | <b><math>3.94 \times 10^5</math></b> |
| <b>Median</b> |        |             |             | <b><math>1.01 \times 10^5</math></b> |

**3<sup>rd</sup> Experiment**

| <b>WT Group</b> |        |             |             |                                      |
|-----------------|--------|-------------|-------------|--------------------------------------|
| Mouse #         | Gender | % huCD45    | % CD4       | VL (copies /mL)                      |
| 545             | Male   | 61.4        | 49.9        | $5.99 \times 10^6$                   |
| 556             | Male   | 57.6        | 43.1        | $1.90 \times 10^7$                   |
| 557             | Male   | 61.1        | 43.6        | $1.76 \times 10^6$                   |
| 559             | Female | 47.2        | 34.5        | $3.52 \times 10^6$                   |
| 561             | Female | 70.0        | 41.8        | $3.94 \times 10^6$                   |
| 562             | Female | 21.4        | 42.2        | $3.79 \times 10^6$                   |
| <b>Mean</b>     |        | <b>53.1</b> | <b>42.5</b> | <b><math>6.34 \times 10^6</math></b> |
| <b>Median</b>   |        |             |             | <b><math>3.86 \times 10^6</math></b> |

| <b>Null Group</b> |        |             |             |                                      |
|-------------------|--------|-------------|-------------|--------------------------------------|
| Mouse #           | Gender | % huCD45    | % CD4       | VL (copies /mL)                      |
| 548               | Female | 70.8        | 54.1        | $4.26 \times 10^6$                   |
| 549               | Female | 67.8        | 45.0        | $2.55 \times 10^6$                   |
| 551               | Female | 59.9        | 47.2        | $4.04 \times 10^6$                   |
| 554               | Male   | 61.0        | 39.0        | $7.08 \times 10^6$                   |
| 555               | Male   | 46.6        | 43.7        | $1.38 \times 10^7$                   |
| 558               | Male   | 48.0        | 57.8        | $5.86 \times 10^6$                   |
| <b>Mean</b>       |        | <b>59.0</b> | <b>47.8</b> | <b><math>6.36 \times 10^6</math></b> |
| <b>Median</b>     |        |             |             | <b><math>4.26 \times 10^6</math></b> |



**Table S2: Baseline characteristics of SHIV-infected rhesus macaques**

| <b>WT Group</b> |             |             |                             |                                      |                       | <b>Null Group</b> |             |             |                             |                                      |                       |
|-----------------|-------------|-------------|-----------------------------|--------------------------------------|-----------------------|-------------------|-------------|-------------|-----------------------------|--------------------------------------|-----------------------|
| Animal #        | Weight, Kg  | Age         | CD4 count (cells / $\mu$ L) | VL (copies /mL)                      | TRIM5 $\alpha$ allele | Animal #          | Weight, Kg  | Age         | CD4 count (cells / $\mu$ L) | VL (copies /mL)                      | TRIM5 $\alpha$ allele |
| JK67            | 14.3        | 7.33        | 661                         | $2.14 \times 10^6$                   | TFP/Q                 | JL72              | 15.5        | 7.30        | 462                         | $3.66 \times 10^3$                   | TFP/Q                 |
| JL22            | 15.0        | 7.32        | 534                         | $3.35 \times 10^4$                   | TFP/TFP               | JM03              | 14.0        | 7.29        | 1042                        | $9.90 \times 10^2$                   | TFP/Q                 |
| JT22            | 14.2        | 7.09        | 810                         | $1.25 \times 10^4$                   | TFP/Q                 | JM71              | 11.7        | 7.28        | 586                         | $3.11 \times 10^4$                   | TFP/Q                 |
| JT35            | 16.5        | 7.06        | 647                         | $1.25 \times 10^3$                   | TFP/Q                 | JV62              | 16.0        | 6.42        | 1193                        | $7.04 \times 10^5$                   | TFP/Q                 |
| JT52            | 16.0        | 7.07        | 786                         | $1.45 \times 10^4$                   | TFP/Q                 | KC46              | 12.1        | 6.28        | 646                         | $2.13 \times 10^4$                   | TFP/TFP               |
| JV73            | 11.0        | 6.28        | 664                         | $4.07 \times 10^3$                   | TFP/TFP               | KF30              | 14.1        | 6.24        | 560                         | $6.45 \times 10^3$                   | TFP/Q                 |
| <b>Mean</b>     | <b>14.5</b> | <b>7.03</b> | <b>684</b>                  | <b><math>3.68 \times 10^5</math></b> |                       | <b>Mean</b>       | <b>13.9</b> | <b>6.80</b> | <b>748</b>                  | <b><math>1.28 \times 10^5</math></b> |                       |
| <b>Median</b>   |             |             |                             | <b><math>1.35 \times 10^4</math></b> |                       | <b>Median</b>     |             |             |                             | <b><math>1.39 \times 10^4</math></b> |                       |
